# Supplementary material for: Cost‐Utility of Catheter Ablation for Atrial Fibrillation in Patients with Heart Failure: An Economic Evaluation
Source: PubMed Central journal article supplement — J Am Heart Assoc. 2021 Jul 9;10(14):e019599. doi: 10.1161/JAHA.120.019599 (PMC8483474; doi:10.1161/jaha.120.019599), 2021-07-09
Supplement: JAH3-10-e019599-s001.pdf [file JAH3-10-e019599-s001.pdf]

# **SUPPLEMENTAL MATERIAL**

## Data S1. Cost Details and Background Event Rates

Costs provided in 2018 Canadian dollars based on publicly available Alberta costing data.

### A. Detailed Cost Breakdowns

| Catheter ablation         | Item                                                                | Subtotals / Totals | Notes      |
|---------------------------|---------------------------------------------------------------------|--------------------|------------|
| Procedure HSC (SOMB)      | 49.98AB Complex ablation of arrhythmic substrate                    | \$2,222.50         |            |
|                           | 49.98Y cardioversion with EPS HSC                                   | \$66.50            |            |
|                           | 49.99AA, intra-operative TEE                                        | \$135.92           | \$2,424.92 |
| Provider fee              | 03.08A Cardiologist (EP) Consultation                               | \$175.00           |            |
|                           | CMXC30 Complex modifier > 30 min                                    | \$31.43            |            |
|                           | 03.08I Prolonged by 15 minutes                                      | \$12.45            | \$218.88   |
| Ambulatory facility costs | CACS C209 – Other Cardiac Intervention                              | \$6,519.71         | \$6,519.71 |
| Hospital admission        | For routine observation (no adverse events), overnight / single day |                    |            |
|                           | Average AB cost of a hospital stay                                  | \$7,983.00         | CIHI       |
|                           | Average AB length of stay 7.8 days - cost per day                   | \$1,023.46         |            |
|                           | Cardiologist consultation and rounding x 1 day for admission        | \$319.53           |            |
|                           | Expected cost per day given 35% risk of overnight observation       | \$470.05           | \$470.05   |
| <b>Total</b>              |                                                                     | <b>\$9,633.56</b>  |            |

| Tamponade                | Item                                                         | Subtotals / Totals | Notes       |
|--------------------------|--------------------------------------------------------------|--------------------|-------------|
| CMG+ hospital cost       | 173 Minor cardiothoracic intervention                        | \$30,921.59        | \$30,921.59 |
| Procedure                | 49.0 Pericardiocentesis                                      | \$218.04           | \$218.04    |
| Provider fee             | 03.08A Cardiology consultation for admission                 | \$175.00           |             |
|                          | 03.03D Daily rounding, regular cardiology ward               | \$104.12           |             |
|                          | COINPT                                                       | \$40.41            |             |
|                          | Total daily rounding given average length of stay 10.87 days | \$1,571.04         | \$1,746.04  |
| Formal TTE               | X306A - Complex complete echocardiogram                      | \$250.25           |             |
| Limited TTE to re-assess | X307 - Ultrasound heart, echo, limited                       | \$59.99            | \$310.24    |
| <b>Total</b>             |                                                              | <b>\$33,195.91</b> |             |

| Effusion                 | Item                                                        | Subtotals / Totals | Notes       |
|--------------------------|-------------------------------------------------------------|--------------------|-------------|
| CMG+ hospital cost       | 209 - Other / Miscellaneous cardiac disorder                | \$13,007.23        | \$13,007.23 |
| Provider fee             | 03.08A Cardiology consultation for admission                | \$175.00           |             |
|                          | 03.03D Daily rounding, regular cardiology ward              | \$104.12           |             |
|                          | COINPT                                                      | \$40.41            |             |
|                          | Total daily rounding given average length of stay 7.31 days | \$1,056.51         | \$1,231.51  |
| Formal TTE               | X306A - Complex complete echocardiogram                     | \$250.25           |             |
| Limited TTE to re-assess | X307 - Ultrasound heart, echo, limited                      | \$59.99            | \$310.24    |
| <b>Total</b>             |                                                             | <b>\$14,548.98</b> |             |

| Pneumonia          | Item                                                                   | Subtotals / Totals | Notes       |
|--------------------|------------------------------------------------------------------------|--------------------|-------------|
| CMG+ hospital cost | 138 Viral / Unspecified pneumonia                                      | \$10,942.11        | \$10,942.11 |
| Provider fee       | 03.08A Internal medicine consultation                                  | \$198.70           |             |
|                    | 03.03D Daily rounding, regular medicine ward                           | \$55.64            |             |
|                    | COINPT                                                                 | \$40.41            |             |
|                    | Total daily rounding given average length of stay 7.58 days            | \$728.06           | \$926.76    |
| ED costs           | CACS B211 Disease or disorder Resp system with acute admission without | \$973.25           | \$973.25    |
| ED provider fee    | 03.04F Comprehensive visit in ED                                       | \$99.19            |             |
|                    | CMXC30 Complex patient requiring > 30 minutes                          | \$31.43            | \$130.62    |
| <b>Total</b>       |                                                                        | <b>\$12,972.74</b> |             |

| Pulmonary vein stenosis | Item                                                                 | Subtotals / Totals | Notes       |
|-------------------------|----------------------------------------------------------------------|--------------------|-------------|
| CMG+ hospital cost      | 195 Heart Failure without coronary angiogram                         | \$12,639.07        | \$12,639.07 |
| Imaging                 | CT pulmonary veins*                                                  | \$850.00           | \$850.00    |
| Provider fee            | 03.08A Cardiology consultation for admission                         | \$175.00           |             |
|                         | 03.03D Daily rounding, cardiologist                                  | \$104.12           |             |
|                         | COINPT                                                               | \$40.41            |             |
|                         | Total daily rounding given average length of stay 11.51 days         | \$1,663.54         | \$1,838.54  |
| ED costs                | CACS B212 Disease/Disorder Cardiovascular System with Acute Admissio | \$1,065.89         | \$1,065.89  |
| ED provider fee         | 03.04F Comprehensive visit in ED                                     | \$99.19            |             |
|                         | CMXC30 Complex patient requiring > 30 minutes                        | \$31.43            | \$130.62    |
| <b>Total</b>            |                                                                      | <b>\$16,524.12</b> |             |

\* Imputed from a private provider's CT coronary angiogram fee (MIC, <https://x-ray.ca/services/computed-tomography/angiogram-ct/>, accessed Jul 03, 2020).

| Stroke             | Item                                                        | Subtotals / Totals | Notes       |
|--------------------|-------------------------------------------------------------|--------------------|-------------|
| CMG+ hospital cost | 026 Ischemic event of central nervous system                | \$17,988.43        | \$17,988.43 |
| Provider fee       | 03.08A Neurology consultation                               | \$197.86           |             |
|                    | 03.08A Cardiology consultation for admission                | \$175.00           |             |
|                    | 03.03D Daily rounding, stroke neurology consultant          | \$59.36            |             |
|                    | COINPT                                                      | \$40.41            |             |
|                    | 03.03D Daily rounding, cardiologist                         | \$104.12           |             |
|                    | COINPT                                                      | \$40.41            |             |
|                    | Total daily rounding given average length of stay 15.1 days | \$3,688.93         | \$4,061.79  |
| <b>Total</b>       |                                                             | <b>\$22,050.22</b> |             |

| Bleeding post-catheter ablation | Item | Subtotals / Totals | Notes |
|---------------------------------|------|--------------------|-------|
|---------------------------------|------|--------------------|-------|

| <b>Bleeding, no vascular intervention required (85% of cases) - 10.82 days</b> |                                                                          |             |                    |       |
|--------------------------------------------------------------------------------|--------------------------------------------------------------------------|-------------|--------------------|-------|
|                                                                                |                                                                          |             | Subtotals / Totals | Notes |
| Blood transfusion x1                                                           | Lagerquist et al., 2017 costing study {Lagerquist, 2017}                 | \$666.10    | \$666.10           |       |
| Hospital admission                                                             | For routine observation (no adverse events), overnight / single day      |             |                    | CIHI  |
|                                                                                | Average AB cost of a hospital stay                                       | \$7,983.00  |                    |       |
|                                                                                | Average AB length of stay 7.8 days - cost per day                        | \$1,023.46  |                    |       |
|                                                                                | Cardiologist consultation and rounding x 1 day for admission             | \$319.53    |                    |       |
|                                                                                | Expected cost per day including cardiologist fees                        | \$1,342.99  | \$1,342.99         |       |
| Ultrasound peripheral arteries                                                 | X332                                                                     | \$161.47    | \$161.47           |       |
| <b>Total</b>                                                                   |                                                                          |             | <b>\$2,170.56</b>  |       |
| <b>Bleeding, vascular intervention required (15% of cases) - Assumed 1 day</b> |                                                                          |             |                    |       |
|                                                                                |                                                                          |             | Subtotals / Totals | Notes |
| CMG+ hospital cost                                                             | 185 Other/miscellaneous vascular intervention                            | \$27,470.28 | \$27,470.28        |       |
| Procedures                                                                     | 51.3B Repair to peripheral vessels, traumatic injury                     | \$755.22    |                    |       |
|                                                                                | Blood transfusion x1, as above {Lagerquist, 2017}                        | \$666.10    |                    |       |
|                                                                                | Anesthesia (51.3B ANES)                                                  | \$287.78    | \$1,709.10         |       |
| Provider fee                                                                   | 03.08A Vascular surgery consultation                                     | \$160.56    |                    |       |
|                                                                                | 03.08A Cardiology consultation                                           | \$175.00    |                    |       |
|                                                                                | 03.03D Daily rounding, regular cardiology ward                           | \$104.12    |                    |       |
|                                                                                | COINPT                                                                   | \$40.41     |                    |       |
|                                                                                | Total daily rounding given average length of stay 10.82 days             | \$1,563.81  | \$1,899.37         |       |
| Ultrasound peripheral arteries                                                 | X332                                                                     | \$161.47    | \$161.47           |       |
| <b>Total</b>                                                                   |                                                                          |             | <b>\$31,240.22</b> |       |
| <b>Weighted average of all bleeding cases</b>                                  |                                                                          |             |                    |       |
| <b>Total</b>                                                                   | (Weighted average duration 2.47 days)                                    |             | <b>\$6,531.01</b>  |       |
| <b>HF admission</b>                                                            |                                                                          |             |                    |       |
|                                                                                | Item                                                                     |             | Subtotals / Totals | Notes |
| CMG+ hospital cost                                                             | 196 – HF without coronary angiogram                                      | \$12,639.07 | \$12,639.07        |       |
| Provider fee                                                                   | 03.08A Cardiology consultation                                           | \$175.00    |                    |       |
|                                                                                | 03.03D Daily rounding, regular cardiology ward                           | \$104.12    |                    |       |
|                                                                                | COINPT                                                                   | \$40.41     |                    |       |
|                                                                                | Total daily rounding given average length of stay 11.35 days             | \$1,640.42  | \$1,815.42         |       |
| ED costs                                                                       | CACS B212 Disease/Disorder Cardiovascular System with Acute Admissioi    | \$1,065.89  | \$1,065.89         |       |
| ED provider fee                                                                | 03.04F Comprehensive visit in ED                                         | \$99.19     |                    |       |
|                                                                                | CMXC30 Complex patient requiring > 30 minutes                            | \$31.43     | \$130.62           |       |
| <b>Total</b>                                                                   |                                                                          |             | <b>\$15,651.00</b> |       |
| <b>Non-HF admission</b>                                                        |                                                                          |             |                    |       |
|                                                                                | Item                                                                     |             | Subtotals / Totals | Notes |
| CMG+ hospital cost                                                             | All combined CMG+ groupers                                               | \$12,169.11 | \$12,169.11        |       |
| Provider fee                                                                   | 03.08A Internal medicine consultation                                    | \$198.70    |                    |       |
|                                                                                | 03.03D Daily rounding, regular medicine ward                             | \$55.64     |                    |       |
|                                                                                | COINPT                                                                   | \$40.41     |                    |       |
|                                                                                | Total daily rounding given average length of stay 8.52 days              | \$818.35    | \$1,017.05         |       |
| ED costs                                                                       | CACS B218 Other condition with acute admission without high resource int | \$907.71    | \$907.71           |       |
| ED provider fee                                                                | 03.04F Comprehensive visit in ED                                         | \$99.19     |                    |       |
|                                                                                | CMXC30 Complex patient requiring > 30 minutes                            | \$31.43     | \$130.62           |       |
| <b>Total</b>                                                                   |                                                                          |             | <b>\$14,224.49</b> |       |
| <b>Amiodarone pulmonary toxicity</b>                                           |                                                                          |             |                    |       |
|                                                                                | Item                                                                     |             | Subtotals / Totals | Notes |
| CMG+ hospital cost                                                             | 142 Other lung disorder                                                  | \$23,637.38 | \$23,637.38        |       |
| Provider fee                                                                   | 03.08A Pulmonary medicine consultation                                   | \$207.31    |                    |       |
|                                                                                | 03.03D Daily rounding, regular pulmonary ward                            | \$52.30     |                    |       |
|                                                                                | COINPT                                                                   | \$40.41     |                    |       |
|                                                                                | Total daily rounding given average length of stay 11.13 days             | \$1,031.86  | \$1,239.17         |       |
| ED costs                                                                       | CACS B211 Disease or disorder respiratory system with acute admission wi | \$973.25    | \$973.25           |       |
| ED provider fee                                                                | 03.04F Comprehensive visit in ED                                         | \$99.19     |                    |       |
|                                                                                | CMXC30 Complex patient requiring > 30 minutes                            | \$31.43     | \$130.62           |       |
| <b>Total</b>                                                                   |                                                                          |             | <b>\$25,980.42</b> |       |

## B. Background Mortality Rates

From Canada Chronic Disease Surveillance System for Heart Failure Patients (CDSS)

| Age band | From CDSS |        |                |        | Calculated |           |                |
|----------|-----------|--------|----------------|--------|------------|-----------|----------------|
|          | Mortality |        | Standard error |        | CV         | Mortality | Standard error |
|          | Male      | Female | Male           | Female | Average    | Average   | Average        |
| 40-54    | 0.034     | 0.038  | 0.001          | 0.002  | 0.041      | 0.036     | 0.001          |
| 55-64    | 0.048     | 0.048  | 0.001          | 0.001  | 0.021      | 0.048     | 0.001          |
| 65-74    | 0.074     | 0.068  | 0.001          | 0.001  | 0.014      | 0.071     | 0.001          |
| 75-84    | 0.127     | 0.105  | 0.001          | 0.001  | 0.009      | 0.116     | 0.001          |
| 85+      | 0.224     | 0.198  | 0.002          | 0.001  | 0.007      | 0.211     | 0.001          |

CV = Coefficient of Variation

Inflated for comorbid AF using OR = 1.14 factor (Mamas et al., Eur J Heart Fail, 2009;11:676-683)

| Age band | Calculated |                | Inflated for comorbid AF |              |              | Age band mid-point<br>for linear interpolation |
|----------|------------|----------------|--------------------------|--------------|--------------|------------------------------------------------|
|          | Mortality  | Standard error | Mortality                | Post-AF Odds | Risk         |                                                |
|          | Average    | Average        | Odds                     | Post-AF Odds | Risk         |                                                |
| 40-54    | 0.036      | 0.001          | 0.038                    | 0.043        | <b>0.041</b> | <b>47.5</b>                                    |
| 55-64    | 0.048      | 0.001          | 0.050                    | 0.057        | <b>0.054</b> | <b>60</b>                                      |
| 65-74    | 0.071      | 0.001          | 0.077                    | 0.087        | <b>0.080</b> | <b>70</b>                                      |
| 75-84    | 0.116      | 0.001          | 0.131                    | 0.149        | <b>0.130</b> | <b>80</b>                                      |
| 85+      | 0.211      | 0.001          | 0.267                    | 0.304        | <b>0.233</b> | <b>85</b>                                      |

**C. Yearly Event Rates from CASTLE-AF - Approximate Calculations Based on Supplemental Data**

Yearly outcome rates in CASTLE-AF - interpolated from published Kaplan-Meier cumulative survival data

What is the HF admission rate per year in the control arm of CASTLE-HF?

| Calculation step | Time point (months) |       |       |       |       |       |                                                                                                        |
|------------------|---------------------|-------|-------|-------|-------|-------|--------------------------------------------------------------------------------------------------------|
|                  | 0                   | 12m   | 24m   | 36m   | 48m   | 60m   |                                                                                                        |
| 1                |                     | 0.142 |       | 0.358 |       | 0.463 | KM cumulative event rates from Supplement table S6                                                     |
| 2                |                     | 0.858 |       | 0.642 |       | 0.537 | Complement taken to calculate cumulative survival                                                      |
| 3                |                     | 0.858 |       | 0.748 |       | 0.836 | Period specific survival - $S[\text{period}](t) = S[\text{cumulative}](t) / S[\text{cumulative}](t-1)$ |
| 4                |                     | 0.858 | 0.865 | 0.865 | 0.915 | 0.915 | Interpolated per year - See note.                                                                      |
| 5                |                     | 0.142 | 0.135 | 0.135 | 0.085 | 0.085 | Event rate taken as complement of period-specific survival rate.<br>Average yearly event rate = 0.117  |

Note: Interpolation of survival rates per year using the following formula:

$S[\text{cumulative}]$  at 36 =  $S[\text{cumulative } 0-12m] * S[\text{period } 12-24m] * S[\text{period } 24-36m]$ , assume  $S[\text{period } 12-24m]$  and  $S[\text{period } 24-36m]$  are equal = x, solve for x.

What is the all-cause admission rate per year in the control arm of CASTLE-HF?

| Calculation step | Time point (months) |       |       |       |       |       |                                                                                                                                                                                       |
|------------------|---------------------|-------|-------|-------|-------|-------|---------------------------------------------------------------------------------------------------------------------------------------------------------------------------------------|
|                  | 0.000               | 12m   | 24m   | 36m   | 48m   | 60m   |                                                                                                                                                                                       |
| 1                |                     | 0.369 |       | 0.699 |       | 0.815 | KM cumulative event rates from Supplement table S6                                                                                                                                    |
| 2                |                     | 0.631 |       | 0.301 |       | 0.185 | Complement taken to calculate cumulative survival                                                                                                                                     |
| 3                |                     | 0.631 |       | 0.477 |       | 0.615 | Period specific survival                                                                                                                                                              |
| 4                |                     | 0.631 | 0.691 | 0.691 | 0.784 | 0.784 | Interpolated per year - See above note.                                                                                                                                               |
| 5                |                     | 0.369 | 0.309 | 0.309 | 0.216 | 0.216 | Event rate taken as complement of period-specific survival rate.<br>Average yearly event rate = 0.284<br>It turns out these figures are very similar to those of Roy et al. (AF-CHF). |

**Provided for interest only**

What is the all-cause mortality rate per year in the control arm of CASTLE-HF?

| Calculation step | Time point (months) |       |       |       |       |       |                                                                                                       |
|------------------|---------------------|-------|-------|-------|-------|-------|-------------------------------------------------------------------------------------------------------|
|                  | 0.000               | 12m   | 24m   | 36m   | 48m   | 60m   |                                                                                                       |
| 1                |                     | 0.039 |       | 0.172 |       | 0.375 | KM cumulative event rates from Supplement table S6                                                    |
| 2                |                     | 0.961 |       | 0.828 |       | 0.625 | Complement taken to calculate cumulative survival                                                     |
| 3                |                     | 0.961 |       | 0.862 |       | 0.755 | Period specific survival                                                                              |
| 4                |                     | 0.961 | 0.928 | 0.928 | 0.869 | 0.869 | Interpolated per year - see above note.                                                               |
| 5                |                     | 0.039 | 0.072 | 0.072 | 0.131 | 0.131 | Event rate taken as complement of period-specific survival rate.<br>Average yearly event rate = 0.089 |

**Table S1. Costs of Treatment Outcomes and On-Going Care (2018 Canadian Dollars).**

|                                  | Cost, mean (sd)<br>\$ 2018 CAD                                  | Probability Distribution                                                                             | Sources and Assumptions                                                                             |
|----------------------------------|-----------------------------------------------------------------|------------------------------------------------------------------------------------------------------|-----------------------------------------------------------------------------------------------------|
| <b>Outcomes</b>                  |                                                                 |                                                                                                      |                                                                                                     |
| <b>Hospitalizations for HF</b>   |                                                                 |                                                                                                      |                                                                                                     |
| ... Costs                        | \$15,651 (\$1,996)                                              | Gamma, a = 61.466, b = 0.003927                                                                      | (F)                                                                                                 |
| ... Duration                     | 11.4 days                                                       | --                                                                                                   | (A)                                                                                                 |
| <b>Hospitalizations, non-HF</b>  |                                                                 |                                                                                                      |                                                                                                     |
| ... Costs                        | \$14,224 (\$1,814)                                              | Gamma, a = 61.466, b = 0.004321                                                                      | (A)                                                                                                 |
| ... Duration                     | 8.5 days                                                        | --                                                                                                   | (A)                                                                                                 |
| <b>Mortality</b>                 |                                                                 |                                                                                                      |                                                                                                     |
| ... Costs                        | \$0                                                             | --                                                                                                   | Assumed.                                                                                            |
| <b>On-Going Medical Care</b>     |                                                                 |                                                                                                      |                                                                                                     |
| <b>Amiodarone</b>                |                                                                 |                                                                                                      |                                                                                                     |
| ... Drug costs                   | \$136                                                           | --                                                                                                   | (B), amiodarone 200mg daily.                                                                        |
| ... Monitoring                   | \$197                                                           | --                                                                                                   | (C)                                                                                                 |
| ... Hypothyroidism               |                                                                 | --                                                                                                   | Assumed in 6% of amiodarone users (27).                                                             |
| Levothyroxine                    | \$41                                                            | --                                                                                                   | (B)                                                                                                 |
| Additional TSH                   | \$95                                                            | --                                                                                                   | (C)                                                                                                 |
| ... Pulmonary toxicity           |                                                                 |                                                                                                      |                                                                                                     |
| Risk / year                      | 0.8%                                                            | Beta, a= 6.14, b = 731.86                                                                            | (2, 3)                                                                                              |
| Hospitalization costs            | \$25,980 (\$3,314)                                              | Gamma, a = 61.466, b = 0.002366                                                                      | (A)                                                                                                 |
| Hospitalization duration         | 11.1 days                                                       | --                                                                                                   | (A)                                                                                                 |
| Death                            | 9.1%                                                            | Beta, a= 3 b= 30                                                                                     | (2, 4)                                                                                              |
| Irreversible                     | 25%                                                             | Beta alpha 25 beta75                                                                                 | (2, 5)                                                                                              |
| On-going yearly costs            | 1: \$10,675 (\$351)<br>2: \$6,116 (\$562)<br>3: \$1,256 (\$676) | Gamma, a = 926.486, b = 0.08679<br>Gamma, a = 118.350, b = 0.01935<br>Gamma, a = 3.458, b = 0.002752 | Annual incremental health care costs in the first, second, and >= third years after diagnosis (31). |
| ... Other complications          | \$0                                                             | --                                                                                                   | (D), assumed.                                                                                       |
| <b>Other drug costs per year</b> |                                                                 |                                                                                                      |                                                                                                     |
| ... ACEi / ARB                   | \$77                                                            | --                                                                                                   | (B), valsartan 320mg daily.                                                                         |
| ... Beta-blocker                 | \$91                                                            | --                                                                                                   | (B), metoprolol 100mg BID.                                                                          |
| ... CCB                          | \$211                                                           | --                                                                                                   | (B), diltiazem, 360mg daily.                                                                        |
| ... Digoxin                      | \$110                                                           | --                                                                                                   | (B), digoxin 0.125mg daily.                                                                         |
| ... Diuretic                     | \$113                                                           | --                                                                                                   | (B), furosemide 60mg and spironolactone 50mg daily.                                                 |
| ... OAC                          | \$1,048                                                         | --                                                                                                   | (B), rivaroxaban 20mg daily.                                                                        |
| <b>Pharmacy fees per year</b>    |                                                                 |                                                                                                      |                                                                                                     |
| ... Dispensing fees              | \$49                                                            | --                                                                                                   | (E)                                                                                                 |
| ... Stocking fees                | +8%                                                             | --                                                                                                   | I.e.: Of drug costs. Assumed.                                                                       |
| <b>Routine clinic follow-up</b>  |                                                                 |                                                                                                      |                                                                                                     |
| ... Cost per visit               | \$441                                                           | --                                                                                                   | (A) including basic lab monitoring.                                                                 |
| ... Visits per year              | 4                                                               | --                                                                                                   | Assumed.                                                                                            |
| <b>Additional Procedures</b>     |                                                                 |                                                                                                      |                                                                                                     |
| Cardioversions                   | \$983 (\$125)                                                   | Gamma, a = 61.466, b = 0.06251                                                                       | (A)                                                                                                 |
| Catheter ablation                | \$9,634 (\$1,228)                                               | Gamma, a = 61.466, b = 0.006380                                                                      | (A)                                                                                                 |

HF, heart failure; TSH, thyroid stimulating hormone; ACEi, angiotensin converting enzyme inhibitor; ARB, angiotensin receptor blocker; CCB, calcium channel blocker; OAC, oral anticoagulant. (A) Estimated from provider billing fees (Alberta Schedule of Medical Benefits [SOMB]), case-mix based ambulatory (Comprehensive Ambulatory Care Classification System [CACS]), and/or case-mix based inpatient (Canada Institute for Health Information Case Mix Group [CMG+]) average encounter costs in 2017-18. Distribution of costs including standard deviations were unavailable. Standard errors were assumed to be 25% of the mean cost. Gamma distributions for costs were imputed from means and standard deviations. No probabilistic distributions were specified for duration of hospitalizations, since duration was not expected to affect results materially apart from its effects on the average costs of a hospitalization. Specific CACS and CMG+ codes available in Supplementary appendix. (B)

Alberta Blue Cross Drug Benefits List prices, 2019. (C) Alberta SOMB, based on recommended monitoring for amiodarone in (27), including TSH testing every 6 months. Additional TSH twice a year (so overall every 3 months) in patients with hypothyroidism. (D) Other complications of amiodarone use were assumed rare (e.g.: cirrhosis), transient (e.g.: hyperthyroidism), or captured elsewhere (e.g.: bradycardia admission to hospital). (E) Assumed medications refilled every 3 months. Alberta dispensing fee is \$12.25 per fill.

**Table S2. Health Utilities Associated With Outcomes.**

|                                                    | Health Utility           | Probability Distribution      | Sources and Assumptions                           |
|----------------------------------------------------|--------------------------|-------------------------------|---------------------------------------------------|
| <b>Survival - Utilities</b>                        |                          |                               |                                                   |
| AF and HF                                          | 0.66 (0.51-0.78)         | Beta, a = 30.56, b = 15.74    | SR of Dyer et al., 2010 (A)                       |
| Decrement associated with previous stroke          | -0.187 (-0.281-(-0.093)) | Normal, u = -0.187, s = 0.048 | Based on moderate vs minor stroke (B)             |
| Irreversible amiodarone-induced pulmonary toxicity | 0.60 (0.503-0.693)       | Beta, a = 60, b = 40          | Previous cost-utility study (C)                   |
| <b>Outcomes</b>                                    |                          |                               |                                                   |
| Hospitalization, HF                                | 0.25                     | --                            | Assumed, for duration of hospitalization.         |
| Hospitalization, non-HF                            | 0.25                     | --                            | Return to previous health utility post-discharge. |
| Mortality                                          | 0                        | --                            |                                                   |

(A) Based on mean EQ-5D values from studies with 0-67% NYHA III/IV patients reported in the systematic review of Dyer et al. 2010 (34). A credible interval was considered the range of mean EQ-5D for these studies, i.e.: 0.58-0.78. (B) From (47). (C) From (29).



**Table S3. Base Case Results – CA vs MED – Cost and Events Enumeration.**

|                                                 | CA<br>(\$CAD) | MED<br>(\$CAD) |
|-------------------------------------------------|---------------|----------------|
| <b>Cost (discounted)</b>                        |               |                |
| Total cost                                      | \$64,960      | \$49,865       |
| CA costs                                        | \$12,563      | \$815 (A)      |
| CA complications                                | \$1,312       | \$0 (A)        |
| HF admissions                                   | \$13,332      | \$13,909       |
| Non-HF admissions                               | \$20,328      | \$18,685       |
| Other medical costs (HF and AF management only) | \$17,425      | \$16,456       |
| <b>Effectiveness</b>                            |               |                |
| LY (undiscounted)                               | 10.58         | 9.69           |
| QALY (discounted)                               | 5.63          | 5.18           |
| <b>Other outcomes (undiscounted)</b>            |               |                |
| HF admissions                                   | 1.05          | 1.07           |
| Non-HF admissions                               | 1.70          | 1.56           |
| Amiodarone pulmonary toxicity cases             | 0.02          | 0.03           |

Obtained from expected values of probabilistic analysis. “Other medical costs” taken as the remainder of total costs after subtracting other costs. Costs in 2018 Canadian dollars (Table S3a) denominated in 2018 US dollars (Table S3b) by foreign currency exchange rates. (A) Due to cross-over, where medically managed patients end up getting catheter ablation for refractory symptoms or other reasons. Such an event was considered uncommon enough that peri-procedural complications after a cross-over CA in a MED patient were not modeled.

**Table S4. Base Cases Analysis with Discount Rate of 1.5% per Year.**

|                                  |          | 95% Confidence Interval |
|----------------------------------|----------|-------------------------|
| Cost (discounted)                |          |                         |
| ... CA                           | \$70,059 | \$60,084-81,569         |
| ... MED                          | \$54,634 | \$46,168-64,556         |
| Effectiveness (QALY, discounted) |          |                         |
| ... CA                           | 6.22     | 4.84-7.47               |
| ... MED                          | 5.71     | 4.47-6.83               |
| Incremental                      |          |                         |
| ... Cost (\$CAD)                 | \$15,425 | \$10,761-20,281         |
| ... Effectiveness (QALY)         | 0.51     | 0.18-0.78               |
| Incremental Cost-Effectiveness   |          |                         |
| ... ICER (\$CAD/QALY)            | \$31,348 | \$19,772-69,326         |

At a willingness-to-pay threshold of \$50,000/QALY, CA was cost-effective in 93% of simulations.

**Figure S1. Cost-Utility Model Comparing CA versus Medical Therapy for AF in patients with HF as a state transition diagram.**

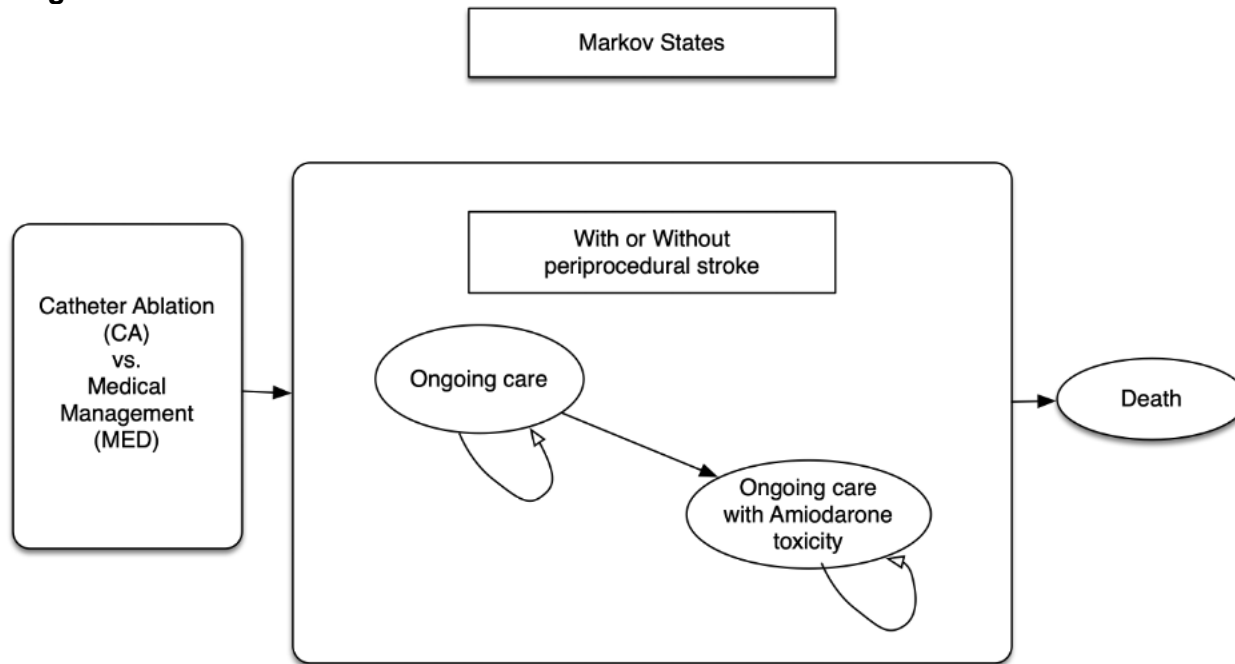

As rendered in TreeAge Pro 2019 (TreeAge Software, LLC, Williamstown, MA).

**Figure S2. Scatterplot of Incremental Cost-Effectiveness Outcomes From Probabilistic Analysis (10000 Monte Carlo Resamplings).**

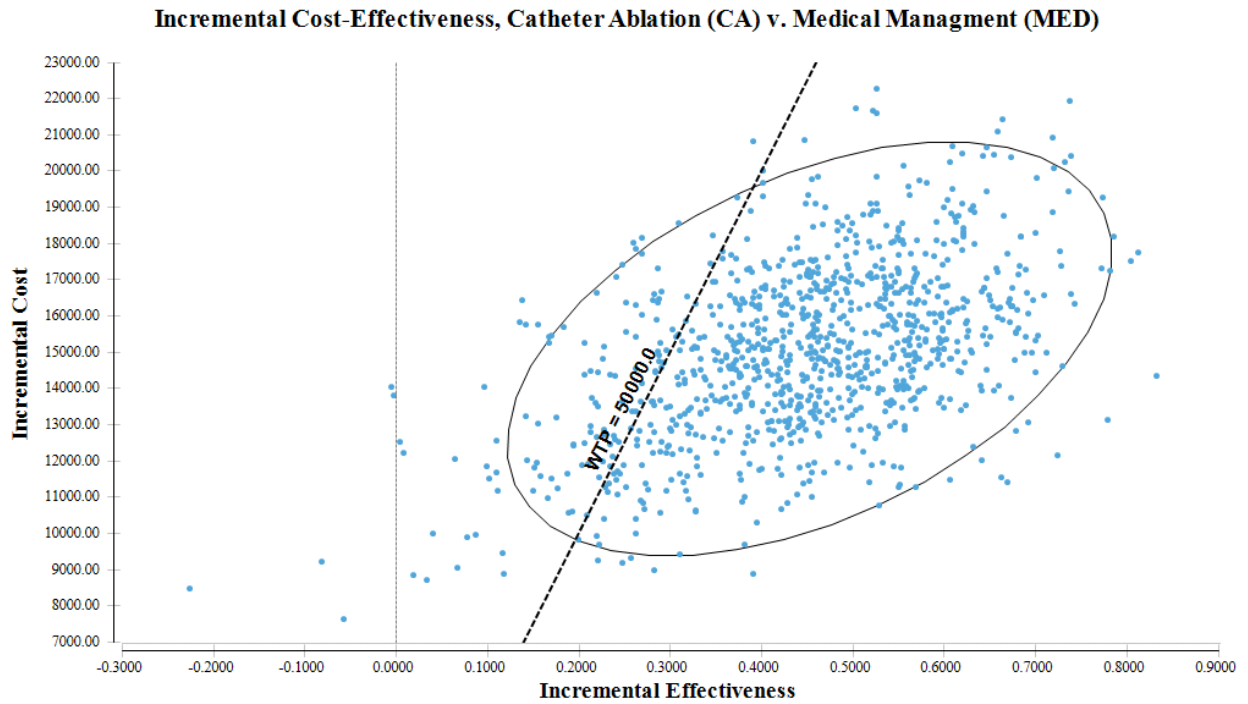

Incremental cost and WTP denominated in 2018 Canadian dollars. WTP line drawn at \$50,000 CAD/QALY.

**Figure S3. Cost-Effectiveness Acceptability Curve – CA vs MED for Patients with HF and Symptomatic AF.**

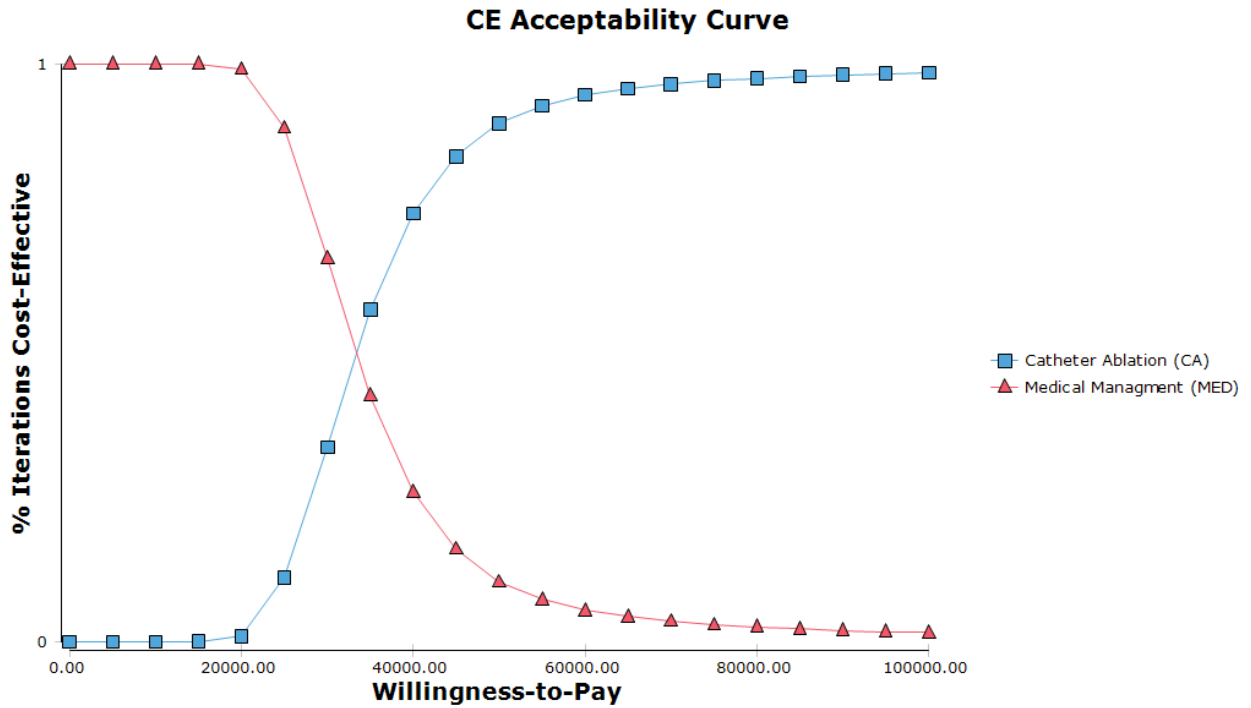

Willingness-to-Pay (WTP) denominated in 2018 Canadian dollars (CAD). At WTP threshold of \$50,000/QALY, in 90% of simulations CA was cost-effective compared to MED. CA remained cost-effective in over 80% of simulations for WTP thresholds above \$43,000. At a WTP threshold of \$100,000/QALY, CA was cost-effective in over 98% of simulations.
